# Supplementary material for: Early oral switch therapy in low-risk Staphylococcus aureus bloodstream infection (SABATO): study protocol for a randomized controlled trial
Source: Springer Nature journal article supplement (doi:10.1186/s13063-015-0973-x), 2015-10-09
Supplement: MOESM1 [file 9782572]

| <b>List of Competent Authorities and Ethics Committees that approved the SABATO trial</b> |                                                                                                                                                                         |
|-------------------------------------------------------------------------------------------|-------------------------------------------------------------------------------------------------------------------------------------------------------------------------|
| <b>Country</b>                                                                            | <b>Competent Authority:</b>                                                                                                                                             |
| Germany                                                                                   | BfArM<br>Bundesinstitut für Arzneimittel und Medizinprodukte<br>Kurt Georg-Kiesinger-Allee 3<br>53175 Bonn<br>Germany                                                   |
| Spain                                                                                     | AEMPS<br>Agencia Espanola de Medicamentos y Productos Sanitarios<br>Calle Campezo 1<br>Edificio 8<br>E-28022 Madrid<br>Espana                                           |
| The Netherlands                                                                           | CCMO<br>Centrale Commissie on Mensgebonden Onderzoek<br>Postbus 16302<br>2500 BH Den Haag<br>The Netherlands                                                            |
| <b>Site</b>                                                                               | <b>Ethics Commission</b>                                                                                                                                                |
| Köln<br>(Lead EC)                                                                         | Geschäftsstelle Ethikkommission<br>Universität zu Köln<br>Gebäude 5<br>Kerpener Str. 62<br>50937 Köln<br>Germany                                                        |
| Aachen                                                                                    | Geschäftsstelle der Ethik Kommission des Universitätsklinikums<br>Pauwelstraße 30<br>352074 Aachen<br>Germany                                                           |
| Berlin                                                                                    | Landesamt für Gesundheit und Soziales Berlin<br>Fehrbelliner Platz 1<br>10707 Berlin<br>Germany                                                                         |
| Frankfurt                                                                                 | Geschäftsstelle der Ethikkommission des Fachbereichs Medizin<br>der Johann Wolfgang Goethe-Universität Haus 1<br>Theodor-Stern-Kai 7<br>60590 Frankfurt/Main<br>Germany |
| Freiburg                                                                                  | Geschäftsstelle der Ethikkommission der Albert-Ludwigs-Universität<br>Freiburg<br>Engelberger Str. 21<br>79106 Freiburg<br>Germany                                      |
| Jena                                                                                      | Geschäftsstelle der Ethik-Kommission der Friedrich-Schiller-Universität<br>Jena Bachstr. 18<br>07740 Jena<br>Germany                                                    |

|                            |                                                                                                                                                                  |
|----------------------------|------------------------------------------------------------------------------------------------------------------------------------------------------------------|
| Krefeld                    | Geschäftsstelle der Ethik Kommission der<br>Ärztammer Nordrhein<br>Tersteegenstr. 9<br>40474 Düsseldorf<br>Germany                                               |
| Leverkusen                 | Geschäftsstelle der Ethik Kommission der<br>Ärztammer Nordrhein<br>Tersteegenstr. 9<br>40474 Düsseldorf<br>Germany                                               |
| Lübeck                     | Geschäftsstelle der Ethik-Kommission der Universität zu Lübeck<br>Ratzeburger Allee 160<br>Haus 21<br>23562 Lübeck<br>Germany                                    |
| Regensburg                 | Geschäftsstelle der Ethik-Kommission der Medizinischen Fakultät<br>Universitätsklinikum Regensburg<br>Franz-Josef-Strauß-Allee 11<br>93053 Regensburg<br>Germany |
| Utrecht<br>(National Lead) | Medisch Ethische Toetsingscommissie<br>UMC Utrecht<br>Huispostnummer D 01.343<br>Postbus 85500<br>3508 GA UTRECHT<br>The Netherlands                             |
| Amsterdam                  | Medisch Ethische Toetsingscommissie<br>AMC Amsterdam<br>The Netherlands<br>Postbus 22660<br>1100 DD Amsterdam                                                    |
| Groningen                  | Medisch Ethische Toetsingscommissie<br>Postbus 30001<br>9700 RB Groningen<br>The Netherlands                                                                     |
| Breda                      | Medisch Ethische Toetsingscommissie<br>Stichting Amphia<br>Molengracht 21<br>4818 CK Breda<br>The Netherlands                                                    |
| Barcelona                  | CEIC Hospital Clínic<br>C. Villarroel, 170<br>Sótano. Escalera 6B<br>08036 Barcelona<br>Spain                                                                    |
| Sevilla                    | CEIC de los hospitales Universitario Virgen Macarena-Virgen del Rocío<br>Avda. Manuel Siurot<br>41013 Sevilla<br>Spain                                           |
